# Supplementary material for: The cyclo-Sb6 ring in the [Sb6(RuCp*)2]2− ion
Source: Royal Society of Chemistry journal article supplement (doi:10.1039/c8cc06542j), 2018-01-01
Supplement: c8cc06542j1.pdf [file c8cc06542j1.pdf]

# The cyclo-Sb<sub>6</sub> Ring in the [Sb<sub>6</sub>(RuCp\*)<sub>2</sub>]<sup>2-</sup> Ion

Yi Wang,<sup>a</sup> Peter Zavalija and Eichhorn Bryan\*<sup>a</sup>

<sup>a</sup>Department of Chemistry and Biochemistry, University of Maryland, College Park, MD 20742

Email: [eichhorn@umd.edu](mailto:eichhorn@umd.edu)

## Experimental Section

**General Data.** All reactions were carried out in a nitrogen atmosphere dry-box (Vacuum Atmosphere Co.) or using standard Schlenk-line techniques. The matrix-assisted laser desorption/ionization time-of-flight (MALDI-TOF, Bruker Autoflex Speed) mass spectra were recorded in the negative ion mode with 2KHz smart beam II laser. All the NMR experiment was performed on a Bruker AV-400 MHz spectrometer at room temperature. <sup>1</sup>H NMR and <sup>13</sup>C NMR spectra were calibrated to residual <sup>1</sup>H and <sup>13</sup>C chemical shifts of pyridine-*d*<sub>5</sub>, respectively.

## Chemicals

K (Sigma-Aldrich, 99%), Na (Sigma-Aldrich, 99.7%), Sb (Sigma-Aldrich, 99.999%), chloro(pentamethylcyclopentadienyl)(cyclooctadiene)ruthenium(II) (Cp\*RuCl(COD), Sigma-Aldrich) and benzophenone (Aldrich, 99.5%) were used as received. Melts of nominal composition of “K<sub>3</sub>Sb” were prepared by fusion of stoichiometric ratios of the elements at high temperature (~1100 °C). The elements were loaded into quartz tubes in a nitrogen atmosphere dry box and then sealed under vacuum. CAUTION: the fusion process can be very exothermic and the reactions should be conducted behind blast shields on small scales (<10g) using full protective gear. 4,7,13,16,21,24-Hexaoxa-1,10-diazobicyclo[8,8,8]hexacosane (2,2,2-crypt) were purchased from Fisher Scientific. Anhydrous ethylenediamine (en) was vacuum distilled from K<sub>4</sub>Sn<sub>9</sub>, and stored under dinitrogen. Toluene was distilled from sodium/benzophenone under dinitrogen and stored under dinitrogen.

**Synthesis of [K([2.2.2]crypt)]<sub>2</sub>[Sb<sub>6</sub>(RuCp\*)<sub>2</sub>]•2tol.** 49.3mg (0.21 mmol) of “K<sub>3</sub>Sb” and 160.8 mg (0.43 mmol) of [2.2.2]crypt were weighed out into a 10 mL scintillation vial. Then ca. 3 mL of ethylenediamine was added. The reaction mixture was stirred for 20 min, resulting in a dark brown-green solution, to which 2ml brown/orange toluene solution of Cp\*RuCl(cod) (38.0mg, 0.1mmol) was added dropwise. The reaction mixture was then stirred for 1.5h, then heated at 60°C for 1h and at 65°C for another 1.5h. The resulting dark brown-red solution was subsequently centrifuged and filtered through glass wool and transferred to a test tube, and then carefully layered with toluene (3 mL). After about a week, big black-red tabular crystals of [K([2.2.2]crypt)]<sub>2</sub>[Sb<sub>6</sub>(RuCp\*)<sub>2</sub>]•2tol were obtained in approximately 30% yield (based on the precursor “K<sub>3</sub>Sb”).

**Synthesis of [K([2.2.2]crypt)]<sub>2</sub>[Sb<sub>6</sub>(RuCp\*)<sub>2</sub>]•tol•py (2)** 15.3 mg of crystalline [K([2.2.2]crypt)]<sub>2</sub>[Sb<sub>6</sub>(RuCp\*)<sub>2</sub>]•2tol were dissolved in 0.5ml deuterated pyridine in an NMR tube, resulting in a dark red solution. After layering the solution with toluene, black-red blocks of [K([2.2.2]crypt)]<sub>2</sub>[Sb<sub>6</sub>(RuCp\*)<sub>2</sub>]•tol•py were isolated after two weeks (7.3mg, yield 47.7%).

**Crystallographic Studies** (1) A suitable single crystals of  $C_{70}H_{118}K_2N_4O_{12}Ru_2Sb_6$  (UM3011) was selected and measured on a Bruker Smart Apex2 diffractometer.<sup>[1]</sup> The crystal was kept at 150(2) K during data collection. The integral intensity was correct for absorption using SADABS software<sup>[2]</sup> using multi-scan method. Resulting minimum and maximum transmission are 0.691 and 0.789 respectively. The structure was solved with the ShelXS-2015 (Sheldrick, 2015c) program and refined with the ShelXL-2015 (Sheldrick, 2015c) program and least-square minimisation using ShelX software package.<sup>[3-5]</sup> Number of restraints used = 758.

(2) A suitable single crystals of  $C_{68}H_{115}K_2N_5O_{12}Ru_2Sb_6$  (UM3072) was selected and measured on a diffractometer.<sup>[1]</sup> The crystal was kept at 150(2) K during data collection. The integral intensities were corrected for absorption using SADABS software<sup>[2]</sup> using multi-scan method. Resulting minimum and maximum transmission are 0.659 and 0.806 respectively. The structure was solved with the ShelXS-2015 (Sheldrick, 2015c) program and refined with the ShelXL-2015 (Sheldrick, 2015c) program and least-square minimisation using ShelX software package.<sup>[3-5]</sup> Number of restraints used = 333.

### Crystal structure determination:

(1) *Crystal Data* for  $C_{70}H_{118}K_2N_4O_{12}Ru_2Sb_6$  ( $M=2218.52$  g/mol): triclinic, space group P-1 (no. 2),  $a = 13.0477(11)$  Å,  $b = 14.1374(12)$  Å,  $c = 23.620(2)$  Å,  $\alpha = 87.7781(14)^\circ$ ,  $\beta = 84.4934(13)^\circ$ ,  $\gamma = 79.1444(14)^\circ$ ,  $V = 4258.2(6)$  Å<sup>3</sup>,  $Z = 2$ ,  $T = 150(2)$  K,  $\mu(\text{MoK}\alpha) = 2.369$  mm<sup>-1</sup>,  $D_{\text{calc}} = 1.730$  g/cm<sup>3</sup>, 101412 reflections measured ( $3.192^\circ \leq 2\theta \leq 62.998^\circ$ ), 27856 unique ( $R_{\text{int}} = 0.0276$ ,  $R_{\text{sig}} = 0.0339$ ) which were used in all calculations. The final  $R_1$  was 0.0248 ( $I > 2\sigma(I)$ ) and  $wR_2$  was 0.0572 (all data).

(2) *Crystal Data* for  $C_{68}H_{110}D_5K_2N_5O_{12}Ru_2Sb_6$  ( $M=2205.48$  g/mol): triclinic, space group P-1 (no. 2),  $a = 13.1437(9)$  Å,  $b = 13.9600(10)$  Å,  $c = 23.4840(16)$  Å,  $\alpha = 88.5283(11)^\circ$ ,  $\beta = 84.7546(11)^\circ$ ,  $\gamma = 79.2296(11)^\circ$ ,  $V = 4215.2(5)$  Å<sup>3</sup>,  $Z = 2$ ,  $T = 150(2)$  K,  $\mu(\text{MoK}\alpha) = 2.393$  mm<sup>-1</sup>,  $D_{\text{calc}} = 1.738$  g/cm<sup>3</sup>, 62159 reflections measured ( $3.166^\circ \leq 2\theta \leq 60^\circ$ ), 24389 unique ( $R_{\text{int}} = 0.0207$ ,  $R_{\text{sig}} = 0.0280$ ) which were used in all calculations. The final  $R_1$  was 0.0279 ( $I > 2\sigma(I)$ ) and  $wR_2$  was 0.0551 (all data).

### References:

1. Bruker (2010). Apex2. Bruker AXS Inc., Madison, Wisconsin, USA.
2. Sheldrick, G. M. (2008), *Acta Cryst.* **A64**, 112-122.
3. Sheldrick, G. M. (2014). SHELXL-2014. University of Gottingen, Germany.
4. Sheldrick, G. M. (2015c). *Acta Cryst.* **C17**, 3-8.
5. Dolomanov, O.V., Bourhis, L.J., Gildea, R.J, Howard, J.A.K. & Puschmann, H. (2009), *J. Appl. Cryst.* **42**, 339-341.

DFT Calculations were performed using the Gaussian 09 program package (Revision A.02)<sup>6</sup> and crystal structure parameters. All DFT calculations were carried out using the B3LYP functional, that is, Beck's hybrid three-parameter exchange functional<sup>7</sup> with the Lee-Yang-Parr correlation functional.<sup>8</sup> In these calculations, the solvent effects were taken into account by the Polarizable Continuum Model.<sup>9</sup>

### References:

6. M. J. Frisch, G. W. Trucks, H. B. Schlegel, G. E. Scuseria, M. A. Robb, J. R. Cheeseman, G. Scalmani, V. Barone, B. Mennucci, G. A. Petersson, H. Nakatsuji, M. Caricato, X. Li, H. P. Hratchian, A. F. Izmaylov, J. Bloino, G. Zheng, J. L. Sonnenberg, M. Hada, M. Ehara, K. Toyota, R. Fukuda, J. Hasegawa, M. Ishida, T. Nakajima, Y. Honda, O. Kitao, H. Nakai, T. Vreven, J. A. Montgomery, Jr., J. E. Peralta, F. Ogliaro, M. Bearpark, J. J. Heyd, E. Brothers, K. N. Kudin, V. N. Staroverov, R. Kobayashi, J. Normand, K. Raghavachari, A. Rendell, J. C. Burant, S. S. Iyengar, J. Tomasi, M. Cossi, N. Rega, J. M. Millam, M. Klene, J. E. Knox, J. B. Cross, V. Bakken, C. Adamo, J. Jaramillo, R. Gomperts, R. E. Stratmann, O. Yazyev, A. J. Austin, R. Cammi, C. Pomelli, J. W. Ochterski, R. L. Martin, K. Morokuma, V. G.

Zakrzewski, G. A. Voth, P. Salvador, J. J. Dannenberg, S. Dapprich, A. D. Daniels, O. Farkas, J. B. Foresman, J. V. Ortiz, J. Cioslowski, and D. J. Fox, Gaussian, Inc., Wallingford CT, 2009.  
7. D. Becke, *J. Chem. Phys.* 1993, **98**, 5648.  
8. Lee, W. Yang and R. G. Parr, *Phys. Rev. B.* 1988, **37**, 785.  
9. (a) M. Cossi, G. Scalmani, N. Rega and V. Barone, *J. Chem. Phys.* 2002, **117**, 43; (b) V. Barone, M. Cossi and J. Tomasi, *J. Chem. Phys.* 1997, **107**, 3210.

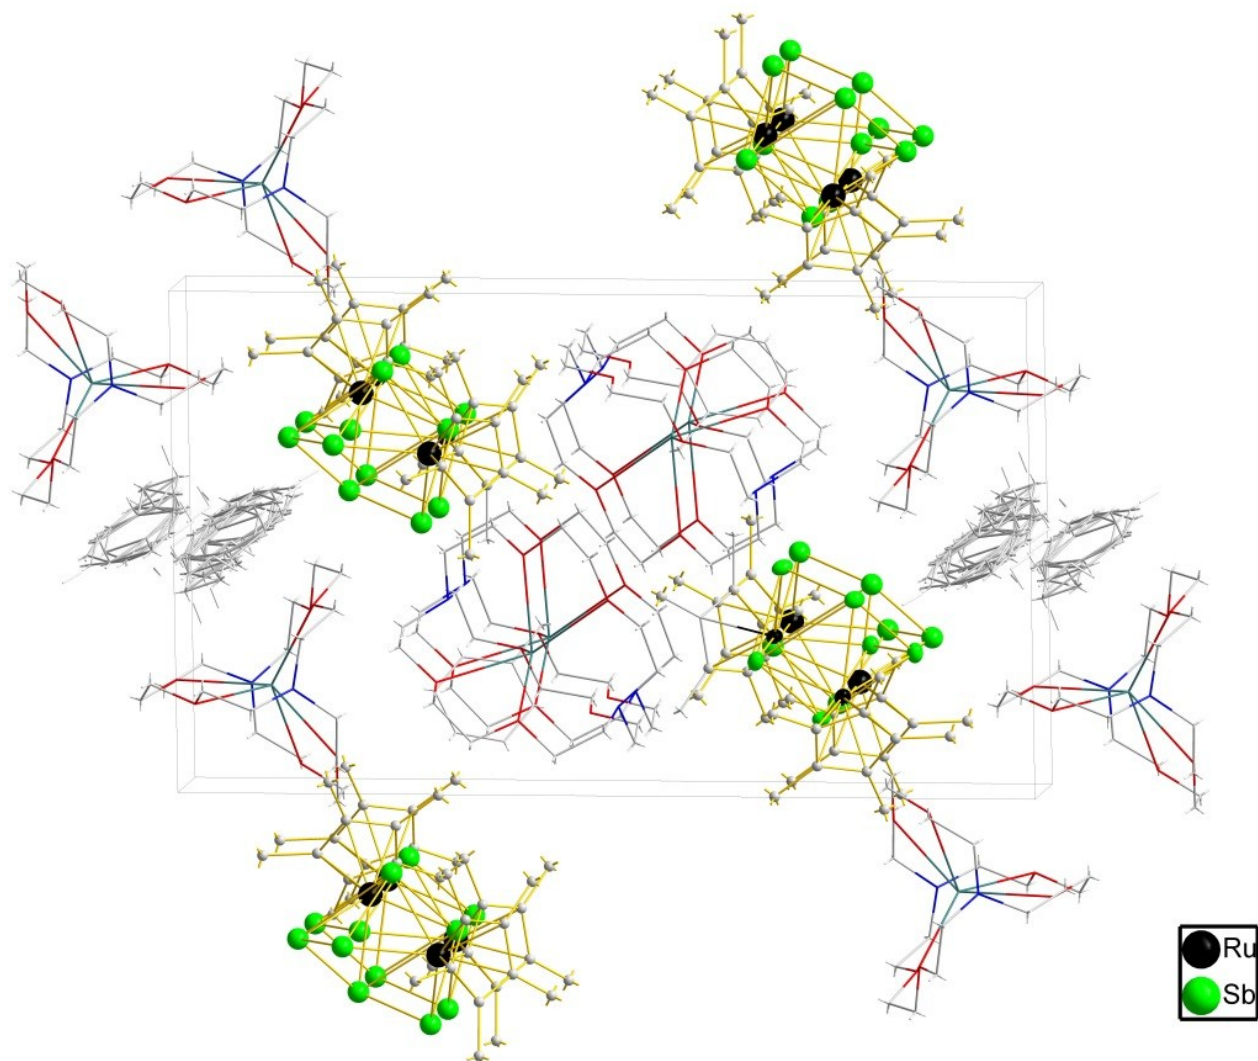

**Figure S1.** View of  $[K([2.2.2]crypt)]_2[Sb_6(RuCp^*)_2] \cdot 2tol$  down the  $a$  axis. (H atoms were set invisible for clarity).

**Table S1** Selected crystallographic data collection, and refinement data for [K([2.2.2]crypt)]<sub>2</sub>[Sb<sub>6</sub>(RuCp\*)<sub>2</sub>]<sub>2</sub>•2tol (**1**) and [K([2.2.2]crypt)]<sub>2</sub>[Sb<sub>6</sub>(RuCp\*)<sub>2</sub>]<sub>2</sub>•tol•py (**2**).

|                                                                                      |                                                                                                                |                                                                                                                |
|--------------------------------------------------------------------------------------|----------------------------------------------------------------------------------------------------------------|----------------------------------------------------------------------------------------------------------------|
| Empirical formula                                                                    | C <sub>70</sub> H <sub>118</sub> K <sub>2</sub> N <sub>4</sub> O <sub>12</sub> Ru <sub>2</sub> Sb <sub>6</sub> | C <sub>68</sub> H <sub>115</sub> K <sub>2</sub> N <sub>5</sub> O <sub>12</sub> Ru <sub>2</sub> Sb <sub>6</sub> |
| Formula weight                                                                       | 2218.52                                                                                                        | 2205.48                                                                                                        |
| Temperature/K                                                                        | 150(2)                                                                                                         | 150(2)                                                                                                         |
| Crystal system                                                                       | triclinic                                                                                                      | triclinic                                                                                                      |
| Space group                                                                          | P -1                                                                                                           | P -1                                                                                                           |
| <i>a</i> /Å                                                                          | 13.0477(11)                                                                                                    | 13.1437(9)                                                                                                     |
| <i>b</i> /Å                                                                          | 14.1374(12)                                                                                                    | 13.9600(10)                                                                                                    |
| <i>c</i> /Å                                                                          | 23.620(2)                                                                                                      | 23.4840(16)                                                                                                    |
| <i>α</i> /°                                                                          | 87.7781(14)                                                                                                    | 88.5283(11)                                                                                                    |
| <i>β</i> /°                                                                          | 84.4934(13)                                                                                                    | 84.7546(11)                                                                                                    |
| <i>γ</i> /°                                                                          | 79.1444(14)                                                                                                    | 79.2296(11)                                                                                                    |
| Volume/Å <sup>3</sup>                                                                | 4258.2(6)                                                                                                      | 4215.2(5)                                                                                                      |
| <i>Z</i>                                                                             | 2                                                                                                              | 2                                                                                                              |
| $\rho_{\text{cal}}$ cg/cm <sup>3</sup>                                               | 1.730                                                                                                          | 1.738                                                                                                          |
| $\mu$ /mm <sup>-1</sup>                                                              | 2.369                                                                                                          | 2.393                                                                                                          |
| <i>F</i> (000)                                                                       | 2188.0                                                                                                         | 2172.0                                                                                                         |
| Crystal size/mm <sup>3</sup>                                                         | 0.26 × 0.105 × 0.10                                                                                            | 0.26 × 0.19 × 0.09                                                                                             |
| Radiation                                                                            | MoK $\alpha$ ( $\lambda$ = 0.71073)                                                                            | MoK $\alpha$ ( $\lambda$ = 0.71073)                                                                            |
| 2 $\theta$ range for data collection/°                                               | 3.192 to 62.998                                                                                                | 3.166 to 60                                                                                                    |
| Index ranges                                                                         | -19 ≤ <i>h</i> ≤ 19, -20 ≤ <i>k</i> ≤ 20,<br>-34 ≤ <i>l</i> ≤ 34                                               | -18 ≤ <i>h</i> ≤ 18, -19 ≤ <i>k</i> ≤ 19,<br>-33 ≤ <i>l</i> ≤ 33                                               |
| Reflections collected                                                                | 101412                                                                                                         | 62159                                                                                                          |
| Independent reflections                                                              | 27856 [ <i>R</i> <sub>int</sub> = 0.0854, <i>R</i> <sub>sigma</sub> =<br>0.0709]                               | 24389 [ <i>R</i> <sub>int</sub> = 0.0207, <i>R</i> <sub>sigma</sub> =<br>0.0280]                               |
| Data/restraints/parameters                                                           | 27856/758/968                                                                                                  | 24389/333/906                                                                                                  |
| Goodness-of-fit on <i>F</i> <sup>2</sup>                                             | 1.001                                                                                                          | 1.157                                                                                                          |
| <i>R</i> <sub>1</sub> / <i>wR</i> <sub>2</sub> [ <i>I</i> ≥ 2 $\sigma$ ( <i>I</i> )] | 0.0248/0.0552                                                                                                  | 0.0279/0.0527                                                                                                  |
| <i>R</i> <sub>1</sub> / <i>wR</i> <sub>2</sub> [all data]                            | 0.0371/0.0572                                                                                                  | 0.0409/0.0551                                                                                                  |

**Table S2** Selected bond lengths(angstroms) and bond angles(degree) of  $[\text{Sb}_6\text{Ru}_2(\text{Cp}^*)_2]^{2-}$  in  $[\text{K}([2.2.2]\text{crypt})]_2[\text{Sb}_6(\text{RuCp}^*)_2]\cdot 2\text{tol}$  (**1**) and  $[\text{K}([2.2.2]\text{crypt})]_2[\text{Sb}_6(\text{RuCp}^*)_2]\cdot \text{tol}\cdot \text{py}$  (**2**).

| <b>Bonds(Å)</b>  | <b>1</b>   | <b>2</b>    |
|------------------|------------|-------------|
| Sb1-Sb2          | 2.7878(2)  | 2.7885(3)   |
| Sb1-Sb3          | 2.8371(3)  | 2.8378(3)   |
| Sb2-Sb5          | 2.9538(2)  | 2.9501(3)   |
| Sb3-Sb4          | 2.7324(2)  | 2.7342(3)   |
| Sb4-Sb6          | 2.8519(3)  | 2.8596(3)   |
| Sb5-Sb6          | 2.7886(3)  | 2.7909(3)   |
| Ru1-Sb6          | 2.6848(3)  | 2.6871(3)   |
| Ru1-Sb1          | 2.6872(3)  | 2.6907(3)   |
| Ru1-Sb2          | 2.7634(3)  | 2.7619(3)   |
| Ru1-Sb5          | 2.7903(3)  | 2.7915(3)   |
| Ru2-Sb2          | 2.6969(3)  | 2.6945(3)   |
| Ru2-Sb3          | 2.7093(3)  | 2.7123(3)   |
| Ru2-Sb4          | 2.7094(3)  | 2.7077(3)   |
| Ru2-Sb5          | 2.7175(3)  | 2.7173(3)   |
| <b>Angles(°)</b> | <b>1</b>   | <b>2</b>    |
| Sb2-Ru2-Sb5      | 66.125(6)  | 66.065(7)   |
| Sb3-Ru2-Sb5      | 108.951(9) | 109.022(10) |
| Sb4-Ru2-Sb5      | 76.843(6)  | 76.683(8)   |
| Ru1-Sb1-Sb2      | 60.594(6)  | 60.507(7)   |
| Ru1-Sb1-Sb3      | 106.736(7) | 106.864(9)  |
| Sb2-Sb1-Sb3      | 73.507(7)  | 73.534(8)   |
| Ru2-Sb2-Ru1      | 104.079(8) | 104.260(9)  |
| Ru2-Sb2-Sb1      | 101.521(8) | 101.560(9)  |
| Ru1-Sb2-Sb1      | 57.902(7)  | 57.994(8)   |
| Ru2-Sb2-Sb5      | 57.272(6)  | 57.338(7)   |
| Ru1-Sb2-Sb5      | 58.311(7)  | 58.401(7)   |
| Sb1-Sb2-Sb5      | 101.083(8) | 101.182(9)  |
| Ru2-Sb3-Sb4      | 59.722(7)  | 59.620(8)   |
| Ru2-Sb3-Sb1      | 99.961(8)  | 99.868(10)  |
| Sb4-Sb3-Sb1      | 102.993(7) | 102.689(9)  |
| Ru2-Sb4-Sb3      | 59.716(6)  | 59.786(8)   |
| Ru2-Sb4-Sb6      | 99.727(7)  | 99.989(8)   |
| Sb3-Sb4-Sb6      | 102.193(9) | 102.637(9)  |
| Ru2-Sb5-Sb6      | 101.128(7) | 101.495(9)  |
| Ru2-Sb5-Ru1      | 102.820(7) | 102.867(9)  |
| Sb6-Sb5-Ru1      | 57.534(5)  | 57.547(7)   |
| Ru2-Sb5-Sb2      | 56.603(6)  | 56.597(8)   |
| Sb6-Sb5-Sb2      | 99.972(8)  | 100.160(9)  |
| Ru1-Sb5-Sb2      | 57.428(5)  | 57.425(7)   |
| Ru1-Sb6-Sb5      | 61.266(8)  | 61.239(8)   |
| Ru1-Sb6-Sb4      | 106.818(8) | 106.347(9)  |

|             |            |             |
|-------------|------------|-------------|
| Sb5-Sb6-Sb4 | 73.431(6)  | 73.099(8)   |
| Sb6-Ru1-Sb1 | 95.378(7)  | 95.579(8)   |
| Sb6-Ru1-Sb2 | 107.690(9) | 107.845(10) |
| Sb1-Ru1-Sb2 | 61.504(6)  | 61.499(7)   |
| Sb6-Ru1-Sb5 | 61.200(7)  | 61.214(8)   |
| Sb1-Ru1-Sb5 | 108.088(7) | 107.977(8)  |
| Sb2-Ru1-Sb5 | 64.261(6)  | 64.173(7)   |
| Sb2-Ru2-Sb3 | 77.016(8)  | 77.057(9)   |
| Sb2-Ru2-Sb4 | 108.863(7) | 108.646(9)  |
| Sb3-Ru2-Sb4 | 60.563(6)  | 60.593(7)   |

**Table S3** Selected bond lengths(angstroms) of the  $\text{Sb}_6\text{Ru}_2$  Core in  $[\text{Sb}_6\text{Ru}_2(\text{Cp}^*)_2]^{2-}$ (1) and  $[\text{Sb}_6\text{Ru}_2(\text{Cp})_2]^{2-}$ (calculation)

| Bonds(Å) | 1         | Calculation |
|----------|-----------|-------------|
| Sb1-Sb2  | 2.7878(2) | 2.88265     |
| Sb1-Sb3  | 2.8371(3) | 2.95071     |
| Sb2-Sb5  | 2.9538(2) | 3.03700     |
| Sb3-Sb4  | 2.7324(2) | 2.82118     |
| Sb4-Sb6  | 2.8519(3) | 2.95073     |
| Sb5-Sb6  | 2.7886(3) | 2.88251     |
| Ru1-Sb1  | 2.6872(3) | 2.74650     |
| Ru1-Sb2  | 2.7634(3) | 2.85037     |
| Ru1-Sb5  | 2.7903(3) | 2.85018     |
| Ru1-Sb6  | 2.6848(3) | 2.74675     |
| Ru2-Sb2  | 2.6969(3) | 2.76542     |
| Ru2-Sb3  | 2.7093(3) | 2.78880     |
| Ru2-Sb4  | 2.7094(3) | 2.78881     |
| Ru2-Sb5  | 2.7175(3) | 2.76534     |

**Table S4** Mulliken atomic charges of metal atoms.

| Atom | Charge    |
|------|-----------|
| Ru1  | -0.846552 |
| Ru2  | -0.863576 |
| Sb1  | -0.180091 |
| Sb2  | 0.159938  |
| Sb3  | -0.137681 |
| Sb4  | -0.137702 |
| Sb5  | 0.160029  |
| Sb6  | -0.180249 |

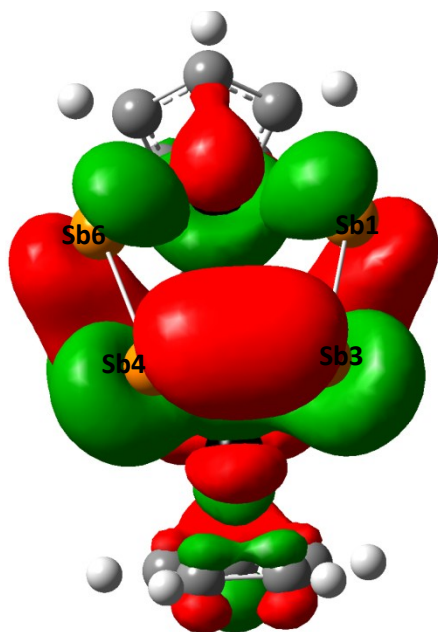

(a) HOMO

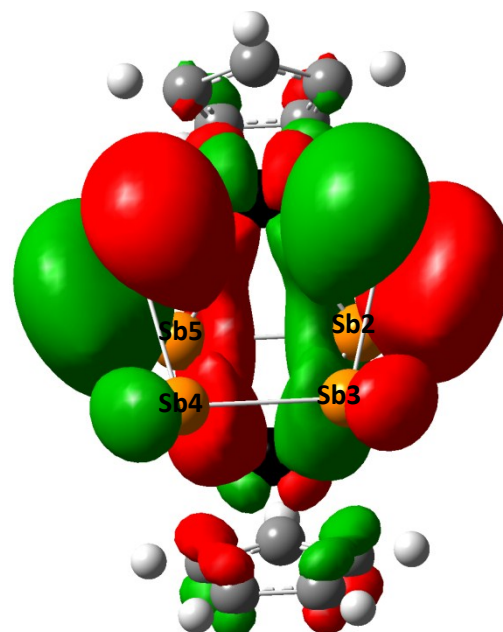

(b) HOMO-1

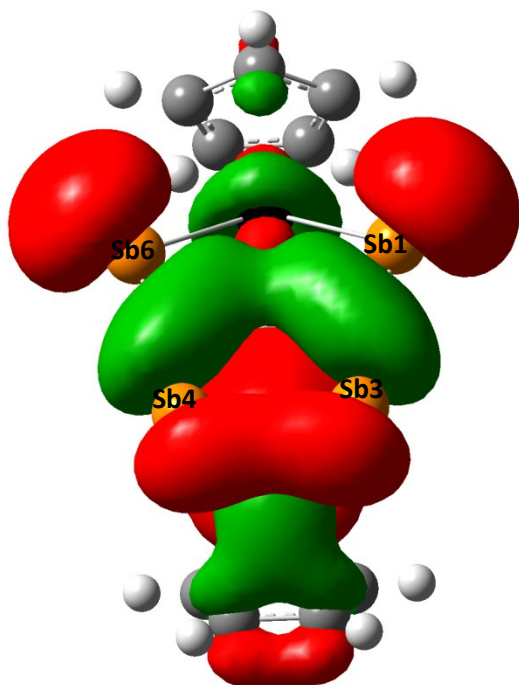

(c) HOMO-4

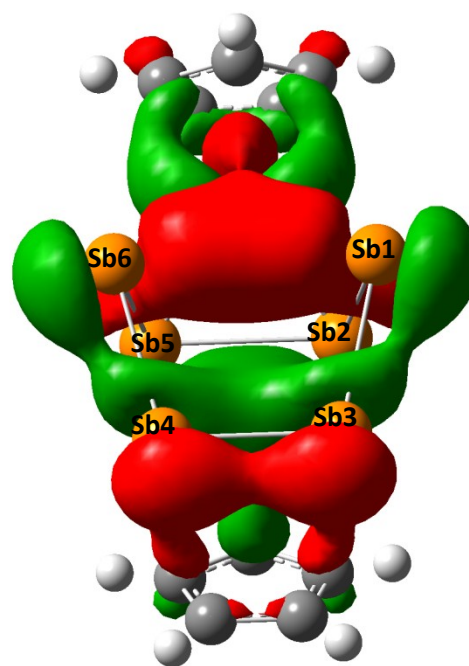

(d) HOMO-5

**Figure S2** Frontier molecular orbital of  $[\text{Sb}_6\text{Ru}_2(\text{Cp})_2]^{2-}$ . All drawing use the atomic labelling scheme shown in **Fig. 1**.

### Energy dispersive X-ray spectroscopy (EDX) analysis

EDX analysis on  $[\text{K}([2.2.2]\text{crypt})]_2[\text{Sb}_6(\text{RuCp}^*)_2] \cdot 2\text{tol}$  was performed on Hitachi SU-70 SEM, operated at an acceleration voltage of 10 keV. Data acquisition was performed with an accumulation time of 120 s. The atomic ratio of K/Ru/Sb is 2.037/5.951/1.975 (Table S5), which is in good agreement with experimental crystallographic data.

**Table S5** EDX analysis of  $[\text{K}([2.2.2]\text{crypt})]_2[\text{Sb}_6(\text{RuCp}^*)_2] \cdot 2\text{tol}$ .

| Element | AN | series   | Net   | [wt.%]   | [norm. wt.%] | [norm. at.%]    | Error in % |
|---------|----|----------|-------|----------|--------------|-----------------|------------|
| C       | 6  | K-series | 24859 | 32.63832 | 35.63419     | 64.81635        | 3.70285    |
| Sb      | 51 | L-series | 11450 | 30.32503 | 33.10856     | <b>5.940776</b> | 1.02798    |
| O       | 8  | K-series | 7374  | 16.92452 | 18.47801     | 25.23181        | 2.111642   |
| Ru      | 44 | L-series | 5791  | 8.366653 | 9.134626     | <b>1.974537</b> | 0.311051   |
| K       | 19 | K-series | 2436  | 3.338202 | 3.644614     | <b>2.036529</b> | 0.135176   |
| Sum:    |    |          |       | 91.59273 | 100          | 100             |            |

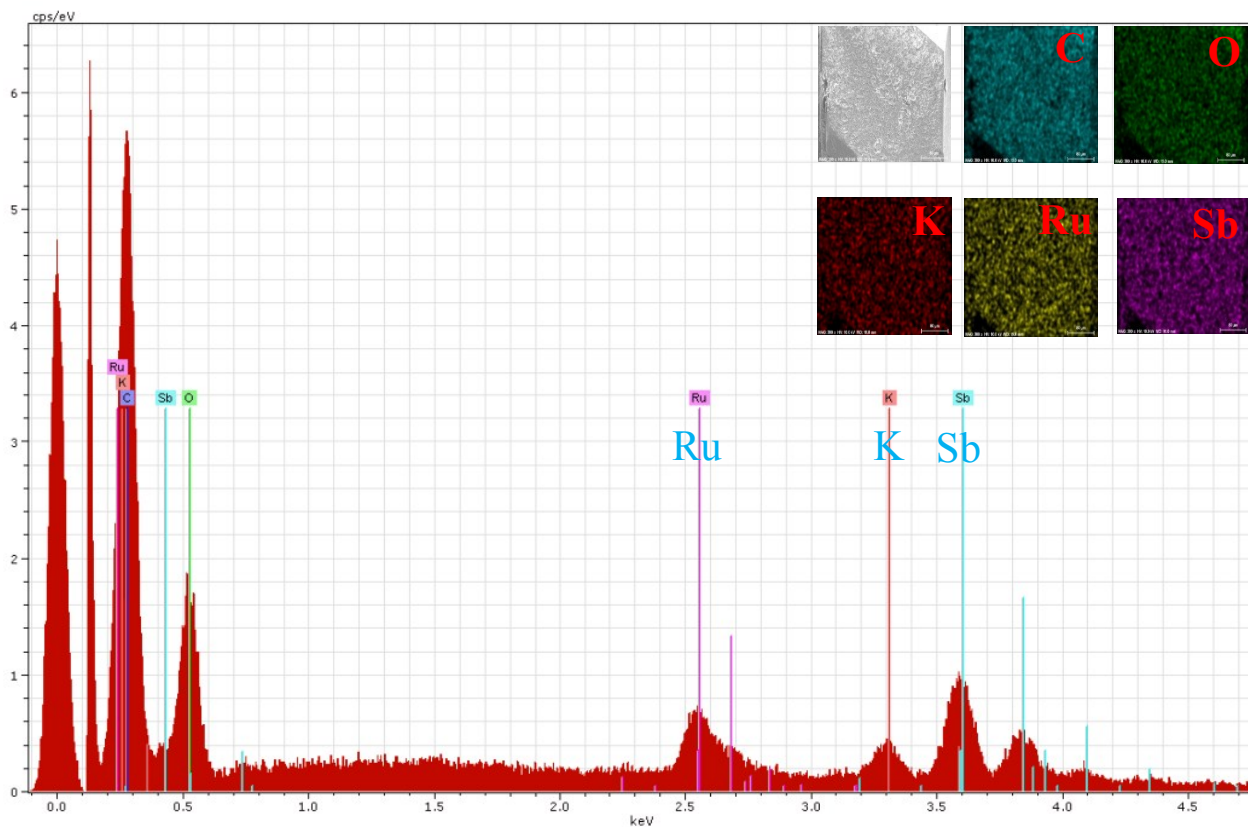

**Figure S3** EDX analysis of  $[\text{K}([2.2.2]\text{crypt})]_2[\text{Sb}_6(\text{RuCp}^*)_2] \cdot 2\text{tol}$  with the elemental mapping inserted.



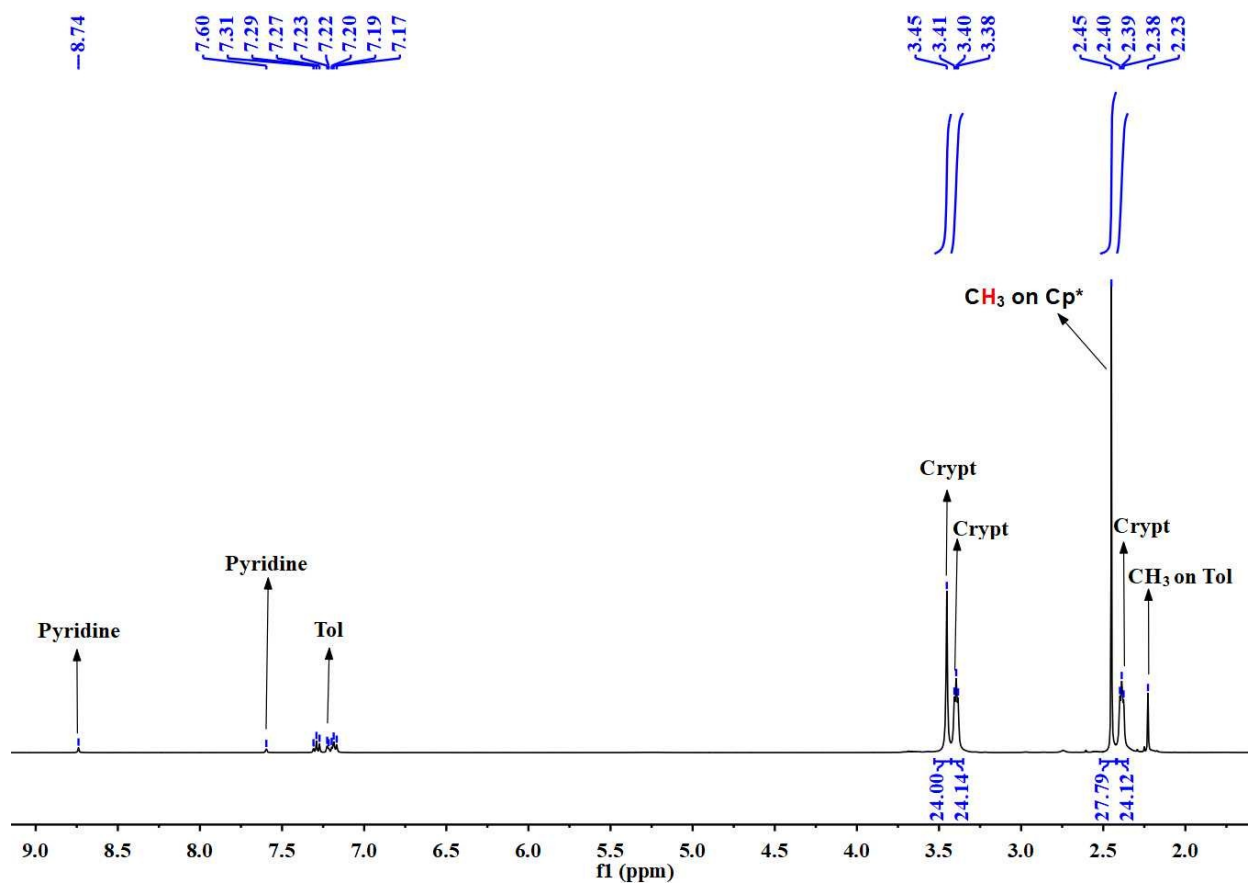

**Figure S4** <sup>1</sup>H NMR of crystal sample in deuterated pyridine. The data were collected at 400 MHz and room temperature.

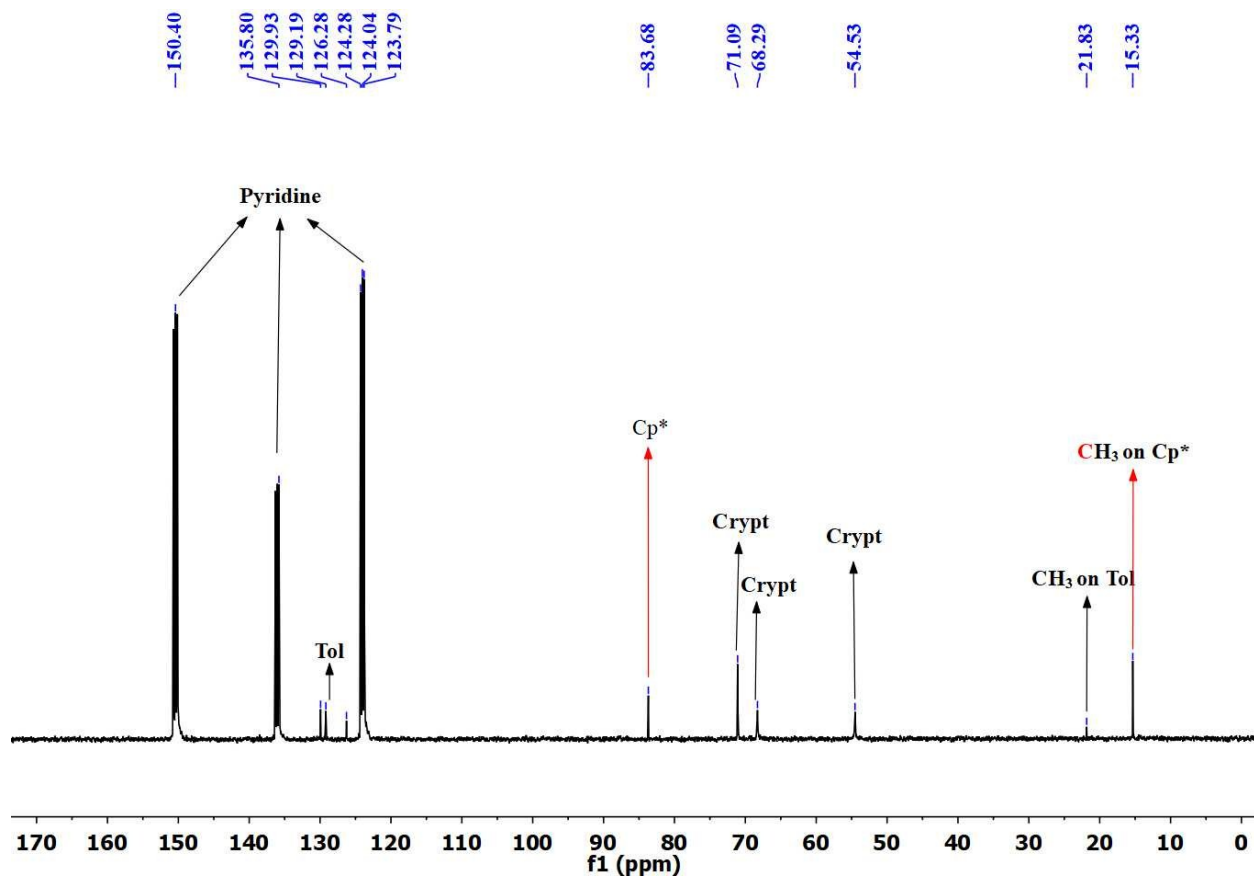

**Figure S5** <sup>13</sup>C NMR of crystal sample in deuterated pyridine. The data were collected at 101MHz and room temperature.

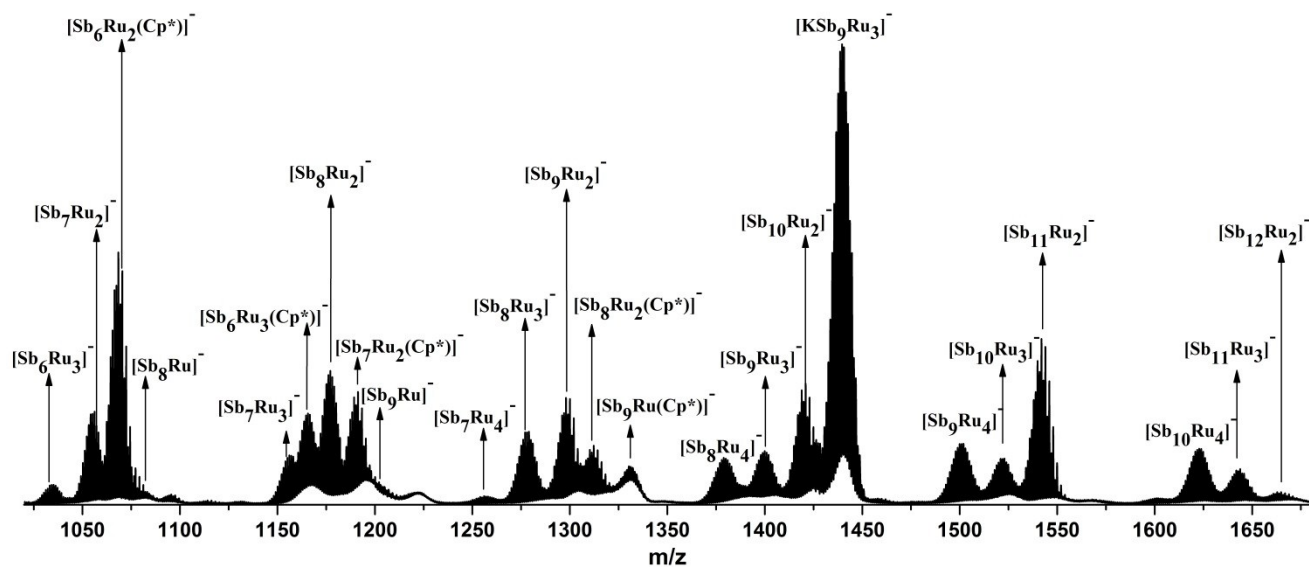

Fig S6 LDI-TOF mass spectrum of  $[K([2.2.2]crypt)]_2[Sb_6(RuCp^*)] \cdot 2tol$  in negative-ion model.

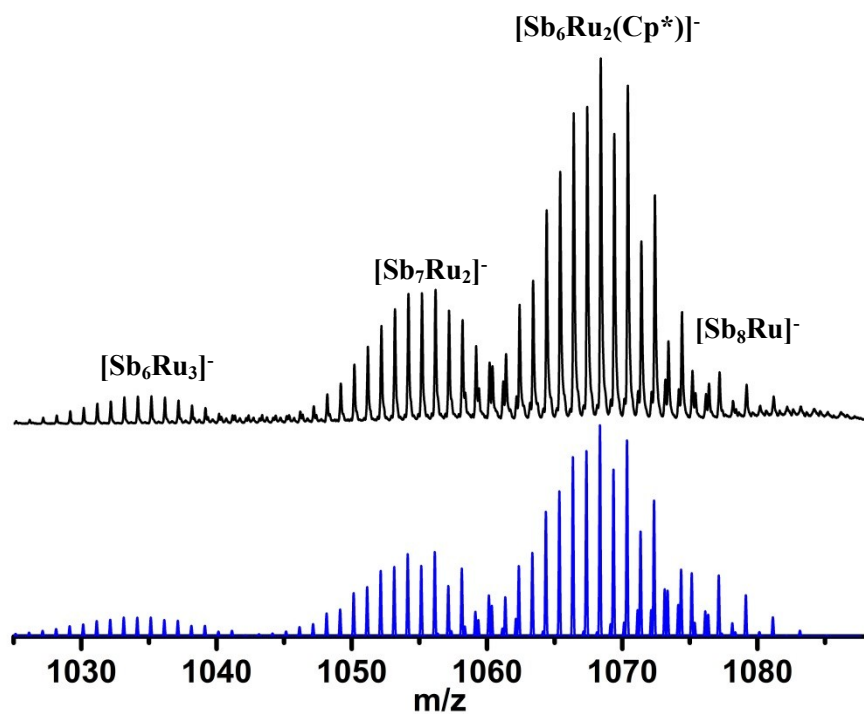

Fig S7 Comparison of experimental (top) and simulated (bottom) mass spectra of  $[Sb_6Ru_3]^-$ ,  $[Sb_7Ru_2]^-$ ,  $[Sb_6Ru_2(Cp^*)]^-$  and  $[Sb_8Ru]^-$  ions.

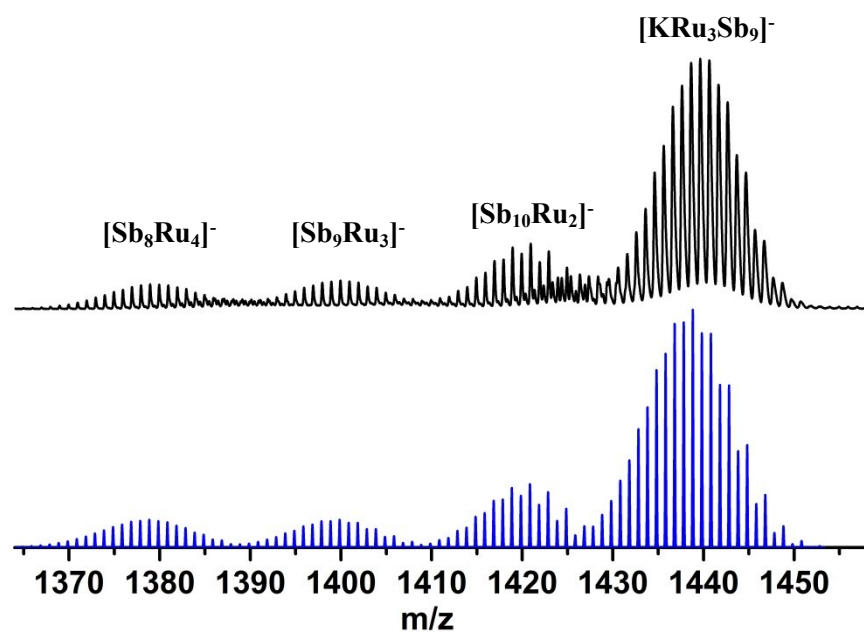

**Fig S8** Comparison of experimental (top) and simulated (bottom) mass spectra of  $[\text{Sb}_8\text{Ru}_4]^-$ ,  $[\text{Sb}_9\text{Ru}_3]^-$ ,  $[\text{Sb}_{10}\text{Ru}_2]^-$  and  $[\text{KRu}_3\text{Sb}_9]^-$  ions.

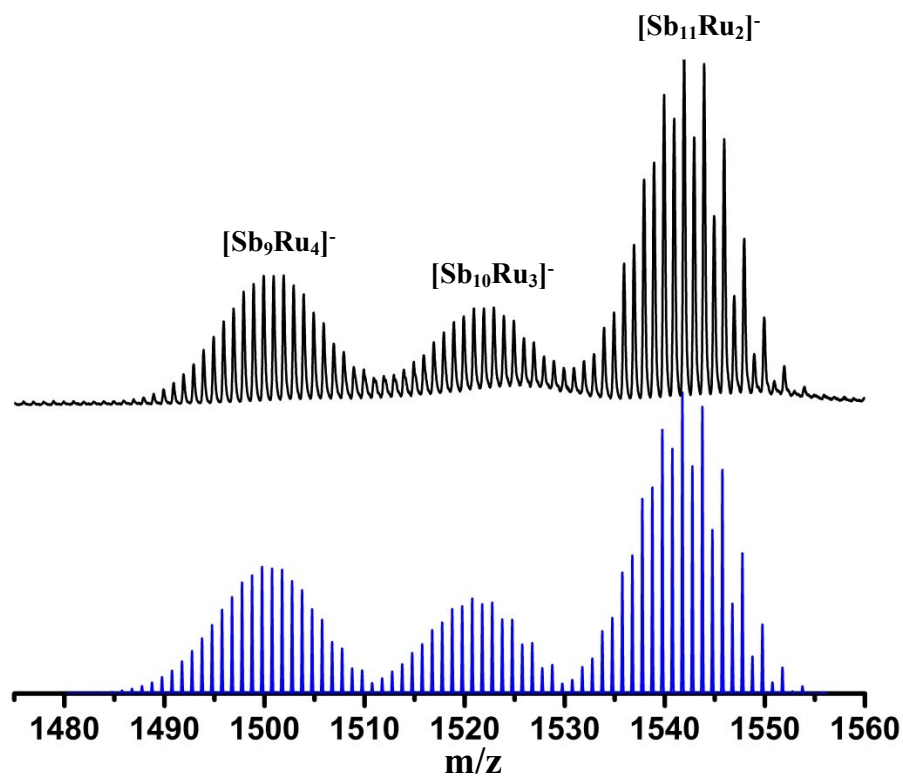

**Fig S9** Comparison of experimental (top) and simulated (bottom) mass spectra of  $[\text{Sb}_9\text{Ru}_4]^-$ ,  $[\text{Sb}_{10}\text{Ru}_3]^-$  and  $[\text{Sb}_{11}\text{Ru}_2]^-$  ions.
